# Supplementary material for: Characterization of two photon excited fragment spectroscopy (TPEFS) for HNO3detection in gas-phase kinetic experiments
Source: Royal Society of Chemistry journal article supplement (doi:10.1039/d1cp00297j), 2021-01-01
Supplement: d1cp00297j1.pdf [file d1cp00297j1.pdf]

## Characterisation of Two Photon Excited Fragment Spectroscopy (TPEFS) for $\text{HNO}_3$ detection in gas-phase kinetic experiments

Damien Amedro,<sup>a</sup> Arne J.C Bunkan,<sup>a</sup> Terry J. Dillon<sup>a</sup> and John. N. Crowley<sup>a\*</sup>

---

<sup>a</sup> *Division of Atmospheric Chemistry, Max Planck-Institut für Chemie, 55128 Mainz, Germany*

\* *Correspondence to: john.crowley@mpic.de*

### Supplementary Information

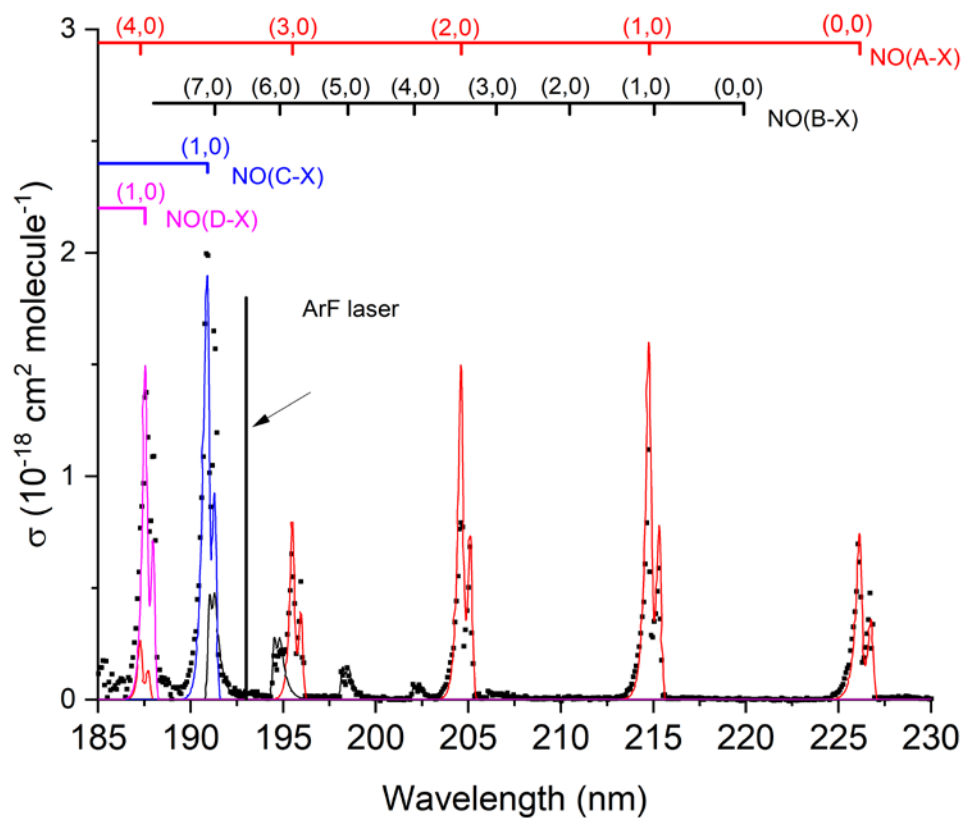

**Figure S1.** NO absorption spectrum (black dots) at 298 K and 19 Torr  $\text{N}_2$  bath-gas ( $[\text{NO}] = 3.1 \times 10^{16}$  molecule  $\text{cm}^{-3}$ ). The spectral resolution ( $\delta\lambda$ ) was 0.16 nm. The grey line indicates the position of the ArF laser pulse at 193 nm. The black, blue, red and purple absorption lines were assigned using LIFBASE.<sup>1</sup>

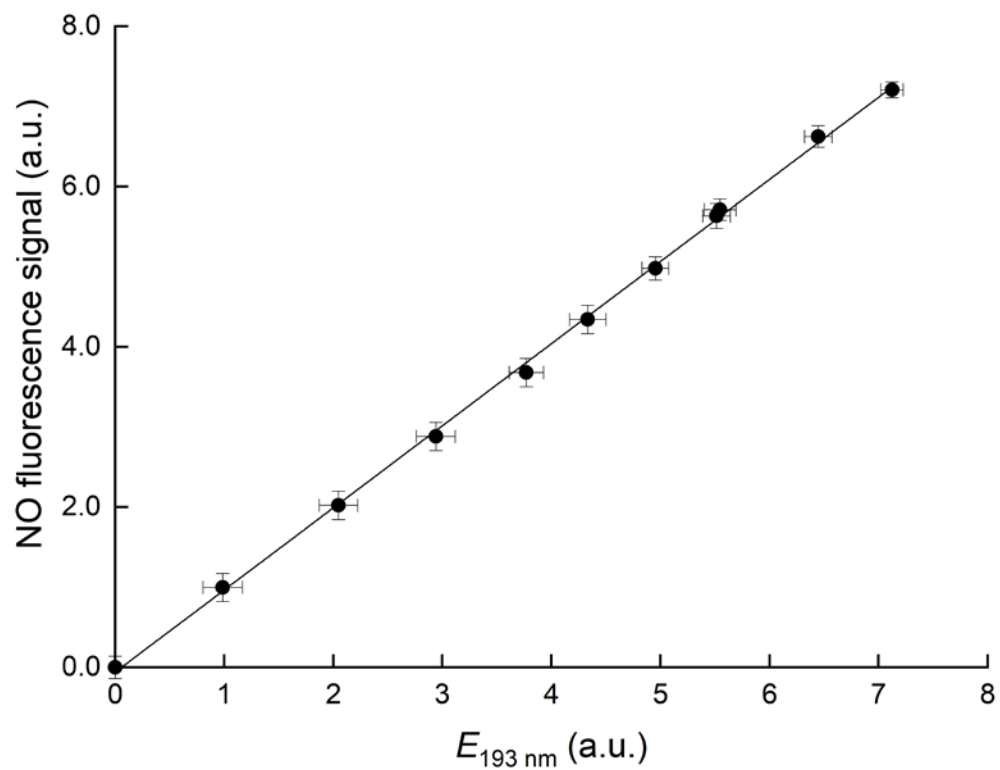

**Figure S2.** NO fluorescence signal as a function of 193 nm laser energy. The NO fluorescence signal was recorded with a PMT through a  $(310 \pm 5)$  nm interference filter. Conditions: Room temperature, 60 Torr  $\text{N}_2$ ,  $[\text{NO}] = 4.1 \times 10^{15}$  molecule  $\text{cm}^{-3}$ .

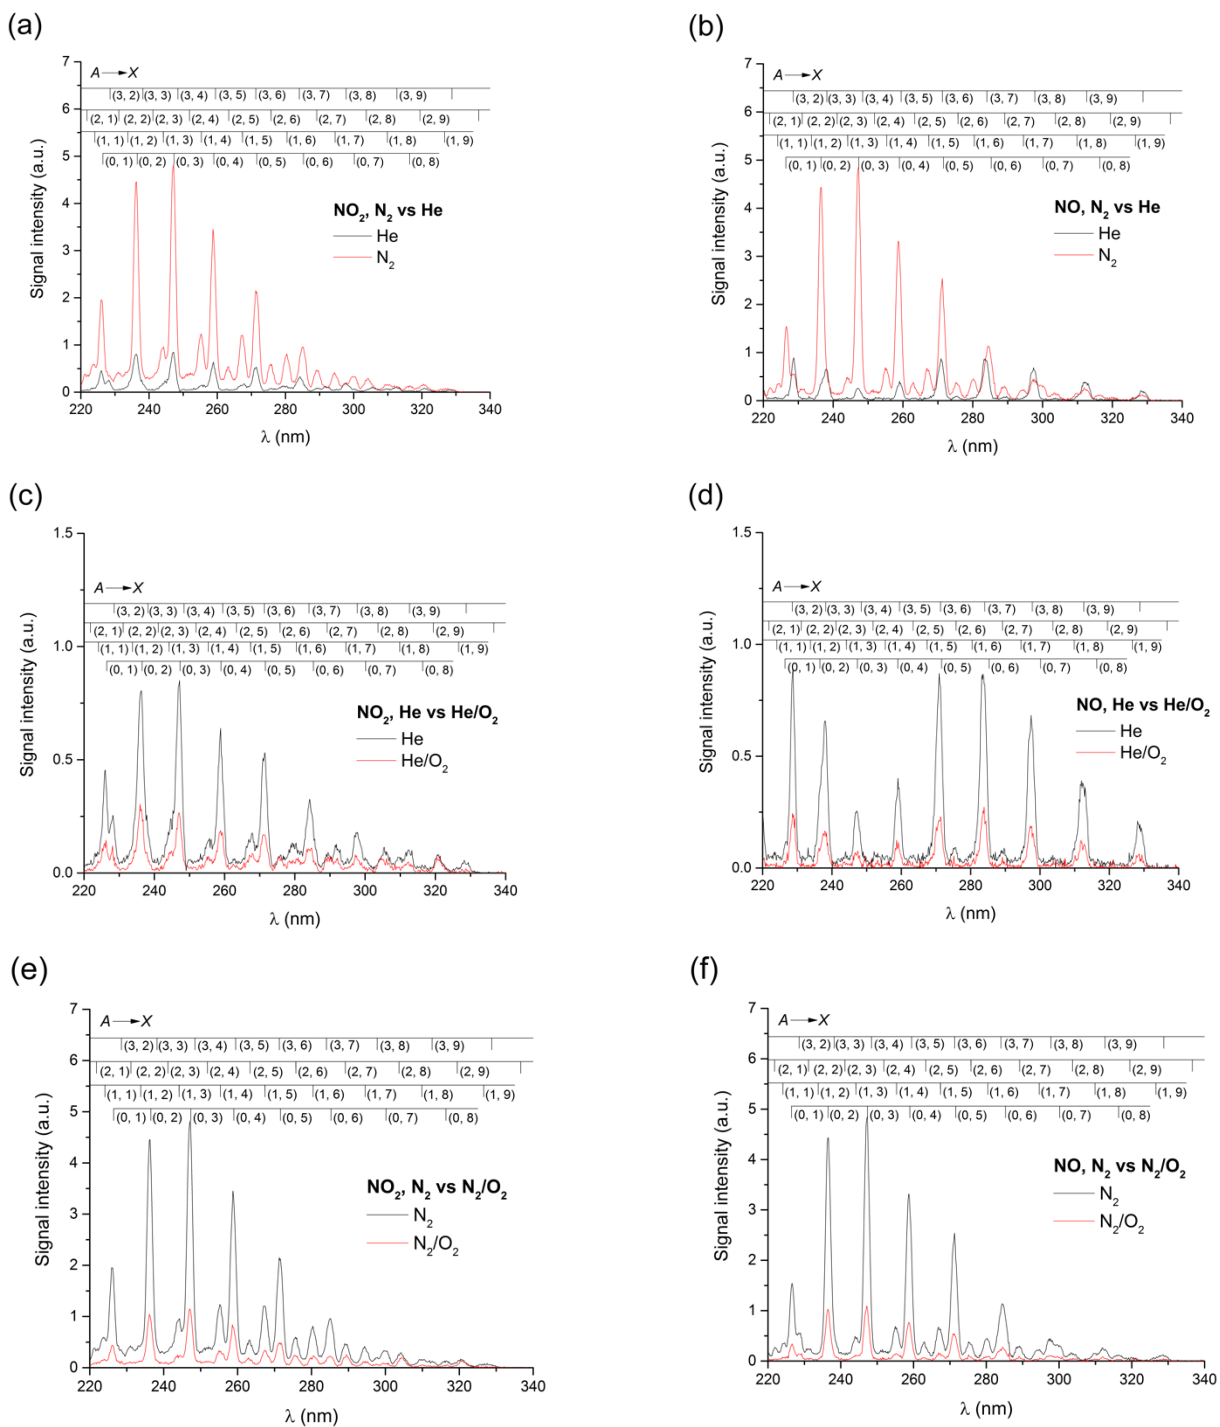

**Figure S3.** Emission following excitation of NO and NO<sub>2</sub> at 193 nm (65 Torr total pressure, [NO] =  $2.6 \times 10^{15}$  molecule cm<sup>-3</sup>, [NO<sub>2</sub>] =  $2.1 \times 10^{15}$  molecule cm<sup>-3</sup>, [O<sub>2</sub>] = 0 or  $4.0 \times 10^{16}$  molecule cm<sup>-3</sup>).

(a) NO<sub>2</sub> excitation, N<sub>2</sub> and He bath-gases.

(b) NO excitation, N<sub>2</sub> and He bath-gases.

(c) NO<sub>2</sub> excitation, He and He/O<sub>2</sub> bath-gases

(d) NO excitation, He and He/O<sub>2</sub> bath-gases.

(e) NO<sub>2</sub> excitation, N<sub>2</sub> and N<sub>2</sub>/O<sub>2</sub> bath-gases

(f) NO excitation, N<sub>2</sub> and N<sub>2</sub>/O<sub>2</sub> bath-gases.

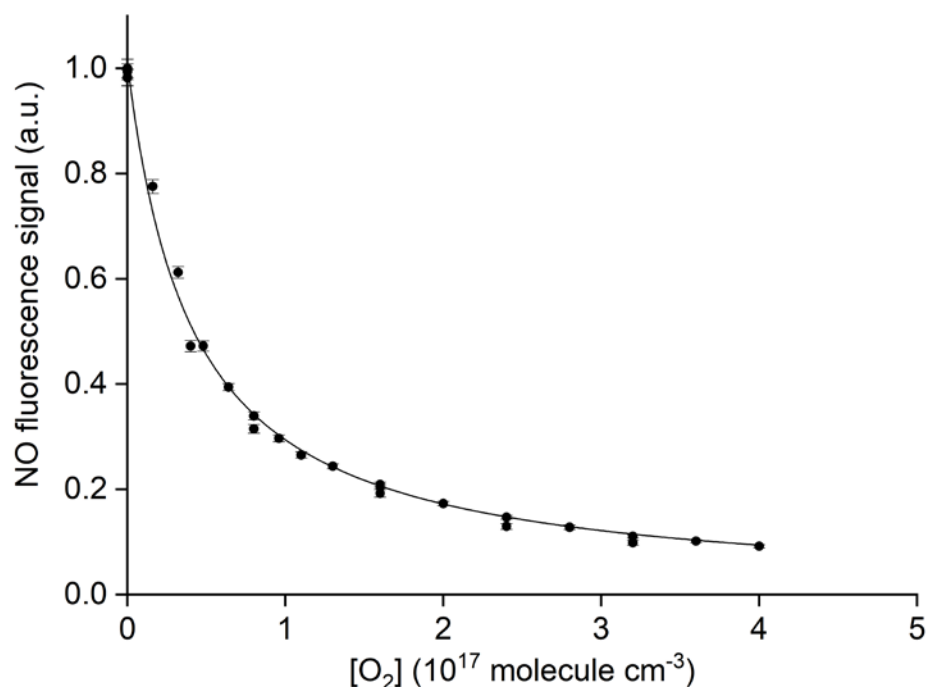

**Figure S4.** NO fluorescence signal recorded with a PMT through a 310 nm interference filter as a function of O<sub>2</sub> concentration. The black line is a fit according to the equation below, from which we derive a quenching rate coefficient of  $(1.5 \pm 0.1) \times 10^{-10} \text{ cm}^3 \text{ molecule}^{-1} \text{ s}^{-1}$  for the NO(A) state.

$$\Gamma = \frac{k_f(\text{NO}(A))}{k_f(\text{NO}(A)) + k_{q\text{O}_2}(\text{NO}(A)) \times [\text{O}_2] + k_{q\text{NO}}(\text{NO}(A)) \times [\text{NO}] + k_{q\text{N}_2}(\text{NO}(A)) \times [\text{NO}]}$$

where  $k_f$  is the natural lifetime ( $4.9 \times 10^6 \text{ s}^{-1}$ ) of the  $A(v'=0)$  state of NO,<sup>2</sup>  $k_q(\text{N}_2) = 4.6 \times 10^{-14} \text{ cm}^3 \text{ molecule}^{-1} \text{ s}^{-1}$ ,<sup>3</sup>  $k_q(\text{NO}) = 2.7 \times 10^{-10} \text{ cm}^3 \text{ molecule}^{-1} \text{ s}^{-1}$ ,<sup>3</sup> and  $k_q(\text{O}_2)$  are the quenching rate constants (in  $\text{cm}^3 \text{ molecule}^{-1} \text{ s}^{-1}$ ) of the first electronic state of NO by N<sub>2</sub>, NO and O<sub>2</sub>.

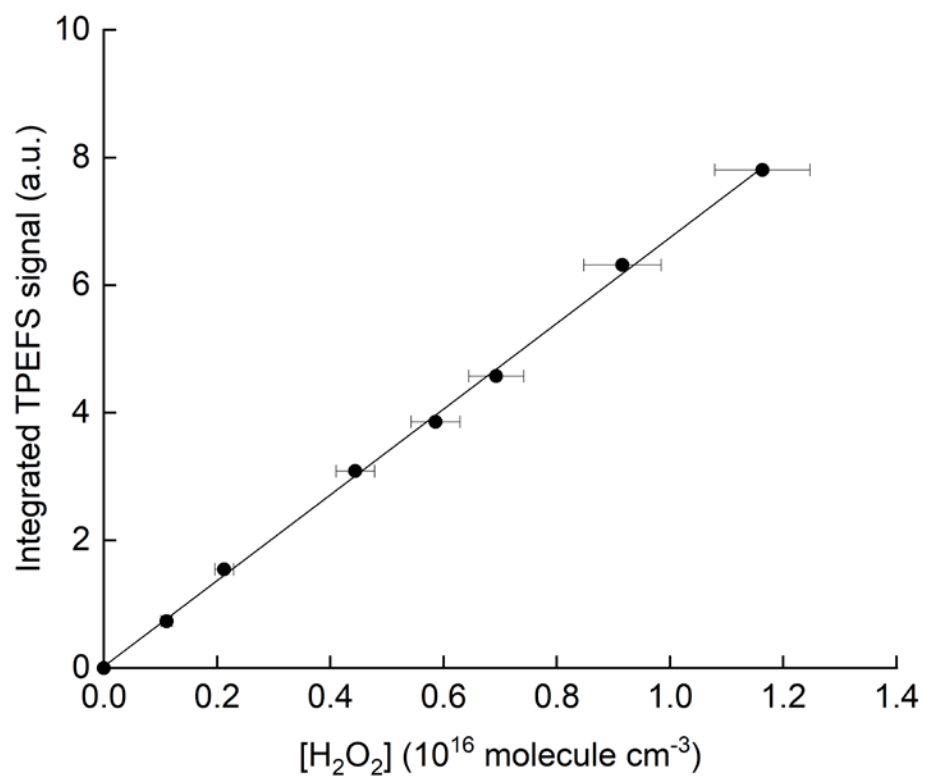

**Figure S5.** Integrated TPEFS signal as a function of [H<sub>2</sub>O<sub>2</sub>]. The experimental conditions were 50 Torr N<sub>2</sub> and ~298 K. Error bars are overall uncertainty at 2 $\sigma$ .

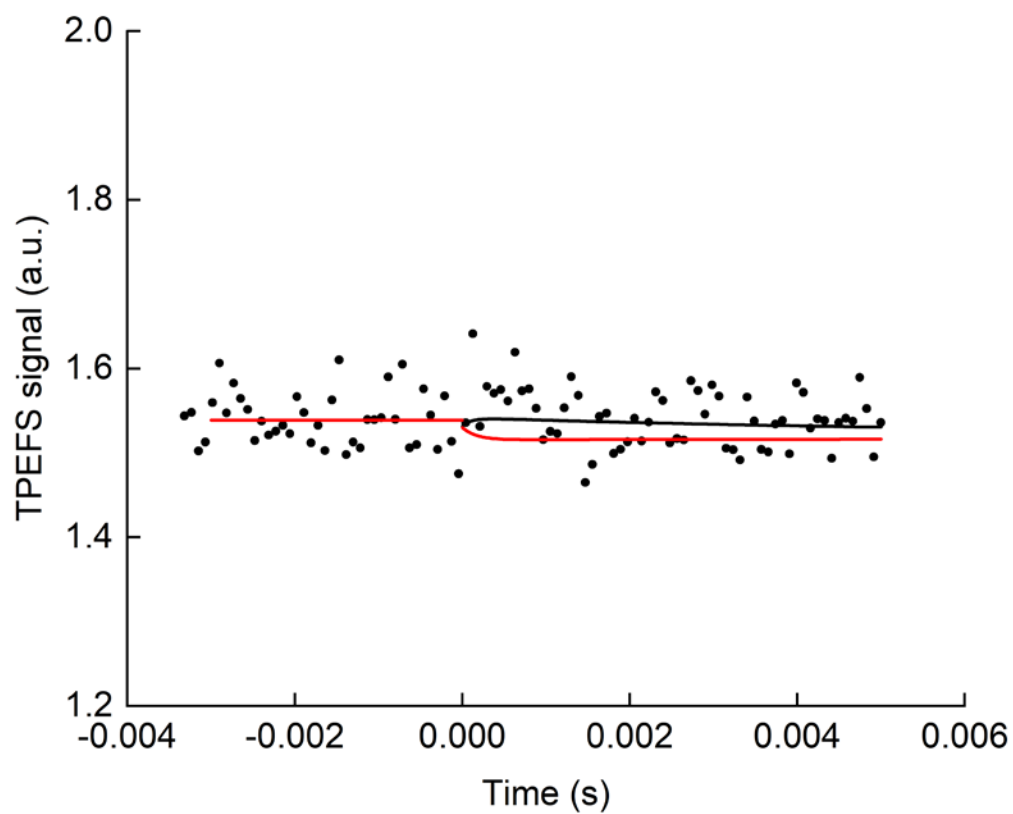

**Figure S6.** Experiment to detect HO<sub>2</sub> using TPEFS. At time  $t = 0$ , H<sub>2</sub>O<sub>2</sub> was photolyzed using a 248 nm laser to form OH and thus HO<sub>2</sub>. The red line corresponds to a simulation of the expected reduction in signal caused by depletion H<sub>2</sub>O<sub>2</sub>. The difference between the black and red lines at  $t > 0$  was used to set an upper limit to the signal from HO<sub>2</sub>. Conditions:  $p = 60$  Torr N<sub>2</sub>,  $[H_2O_2] = 2.4 \times 10^{15}$  molecule cm<sup>-3</sup>, laser-fluence (248 nm) =  $6.8 \times 10^{16}$  photon cm<sup>-2</sup>.

## Parameterisation of the rate coefficient ( $k_2$ ) for reaction between OH and NO<sub>2</sub>

$$k_2(P, T) = \frac{\left(x_{\text{N}_2}k_0^{\text{N}_2}\left(\frac{T}{300}\right)^{-m} + x_{\text{O}_2}k_0^{\text{O}_2}\left(\frac{T}{300}\right)^{-q} + x_{\text{H}_2\text{O}}k_0^{\text{H}_2\text{O}}\left(\frac{T}{300}\right)^{-o}\right)Mk_\infty\left(\frac{T}{300}\right)^{-n}}{\left(x_{\text{N}_2}k_0^{\text{N}_2}\left(\frac{T}{300}\right)^{-m} + x_{\text{O}_2}k_0^{\text{O}_2}\left(\frac{T}{300}\right)^{-q} + x_{\text{H}_2\text{O}}k_0^{\text{H}_2\text{O}}\left(\frac{T}{300}\right)^{-o}\right)M + k_\infty\left(\frac{T}{300}\right)^{-n}}F$$

where

$$\log F = \frac{\log F_c}{1 + \left[ \log \left( \frac{\left(x_{\text{N}_2}k_0^{\text{N}_2}\left(\frac{T}{300}\right)^{-m} + x_{\text{O}_2}k_0^{\text{O}_2}\left(\frac{T}{300}\right)^{-q} + x_{\text{H}_2\text{O}}k_0^{\text{H}_2\text{O}}\left(\frac{T}{300}\right)^{-o}\right)M}{k_\infty\left(\frac{T}{300}\right)^{-n}} \right) / [0.75 - 1.27 \log F_c] \right]^2}$$

The parameters used to generate the solid lines in Figure 10 were:  $k_0(\text{N}_2) = 2.6 \times 10^{-30} \text{ cm}^6 \text{ molecule}^{-2} \text{ s}^{-1}$ ,  $k_0(\text{O}_2) = 2.0 \times 10^{-30} \text{ cm}^6 \text{ molecule}^{-2} \text{ s}^{-1}$ ,  $k_0(\text{H}_2\text{O}) = 2.6 \times 10^{-30} \text{ cm}^6 \text{ molecule}^{-2} \text{ s}^{-1}$ ,  $k_\infty = 6.3 \times 10^{-11} \text{ cm}^3 \text{ molecule}^{-1} \text{ s}^{-1}$ ,  $F_c = 0.39$  and the  $T$ -dependent parameters  $m = 3.6$ ,  $n = 0$ ,  $o = 3.4$ ,  $q = 3.6$  as reported by Amedro et al.<sup>4,5</sup>

## References.

1. J. Luque and D. R. Crosley, *LIFBASE (version 1.5)* <http://www.sri.com/cem/lifbase>, 1999.
2. J. Luque and D. R. Crosley, *J. Chem. Phys.*, 2000, **112**, 9411.
3. T. B. Settersten, B. D. Patterson and C. D. Carter, *J. Chem. Phys.*, 2009, **130**, 204302.
4. D. Amedro, M. Berasategui, A. J. C. Bunkan, A. Pozzer, J. Lelieveld and J. N. Crowley, *Atmos. Chem. Phys.*, 2020, **20**, 3091.
5. D. Amedro, A. J. C. Bunkan, M. Berasategui and J. N. Crowley, *Atmos. Chem. Phys.*, 2019, **19**, 10643.
